# Supplementary material
Source: PubMed Central journal article supplement (PMC2885840)
Supplement: NIHMS205028-supplement-Lassen_et_al__supp.pdf [file NIHMS205028-supplement-Lassen_et_al__supp.pdf]

Fig. S1

A

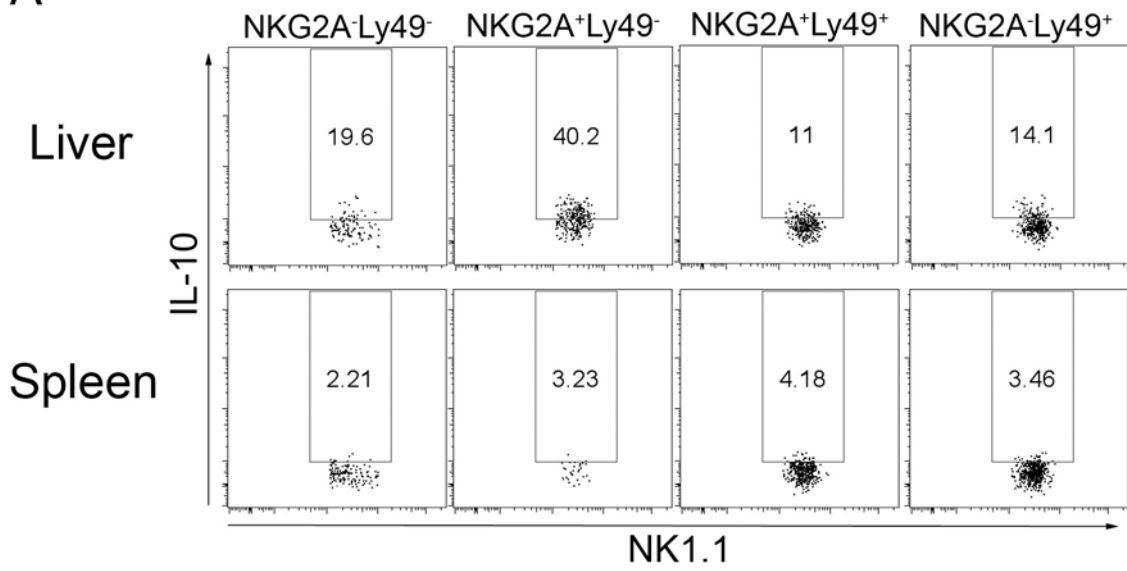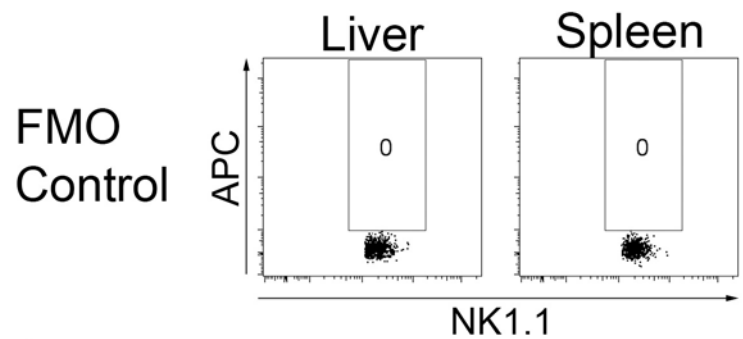

B

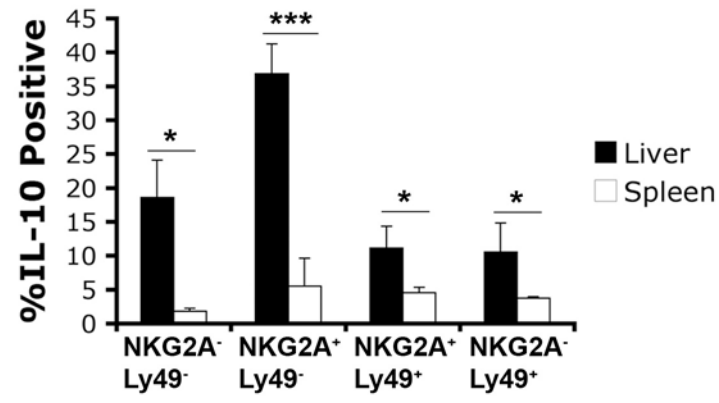

**Fig. S1. IL-10 production by liver and spleen NK cells.** Intracellular expression of IL-10 was analyzed following IL-12 and IL-18 stimulation for 5 hours. (A) Intracellular IL-10 levels in NK cell subsets based on NKG2A and Ly49 expression on liver and spleen NK cells. FMO controls represent background staining for the APC channel on CD3<sup>-</sup>NK1.1<sup>+</sup> gate. (B) Combined results from a single experiment showing intracellular IL-10 staining by NKG2A/Ly49 NK cell subsets. Data is representative of two independent experiments containing 3 mice per experiment. \* =  $p < 0.05$ ; \*\*\* =  $p < 0.0005$

Fig. S2

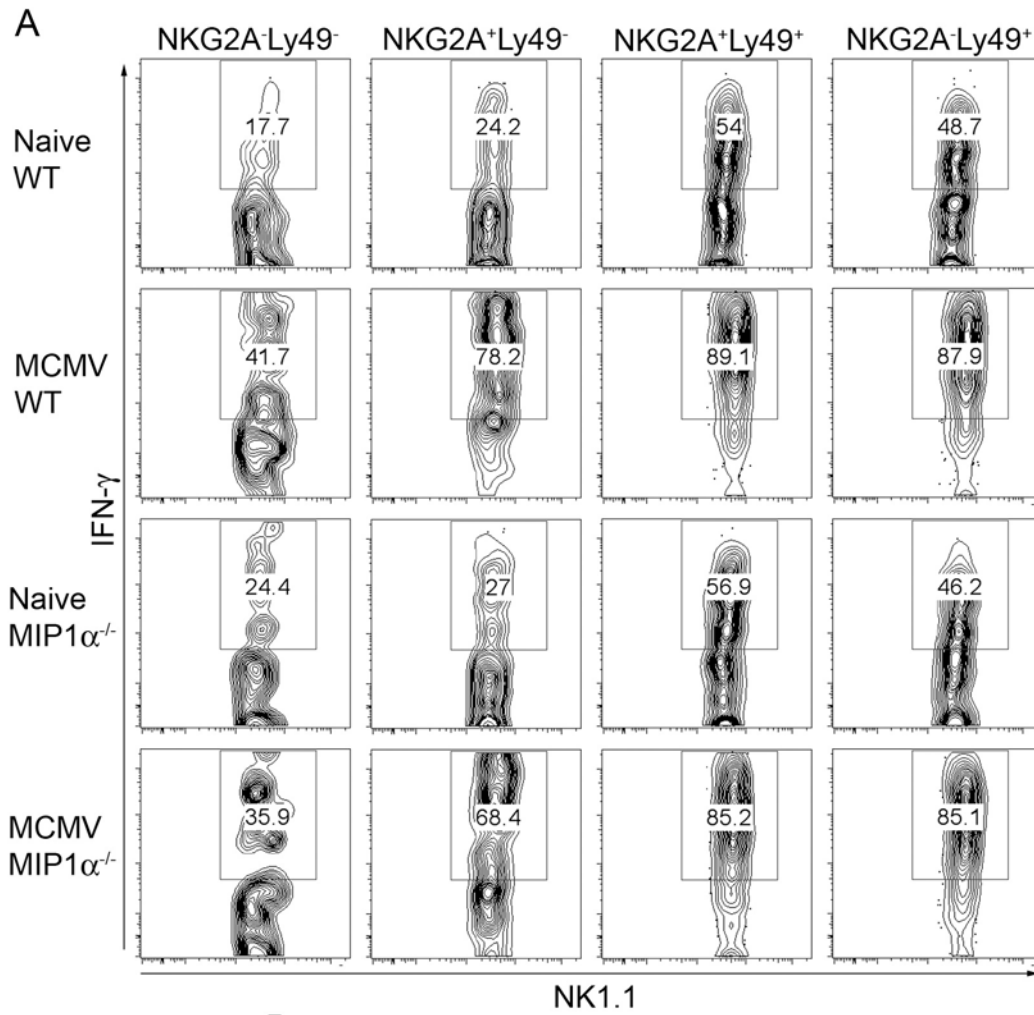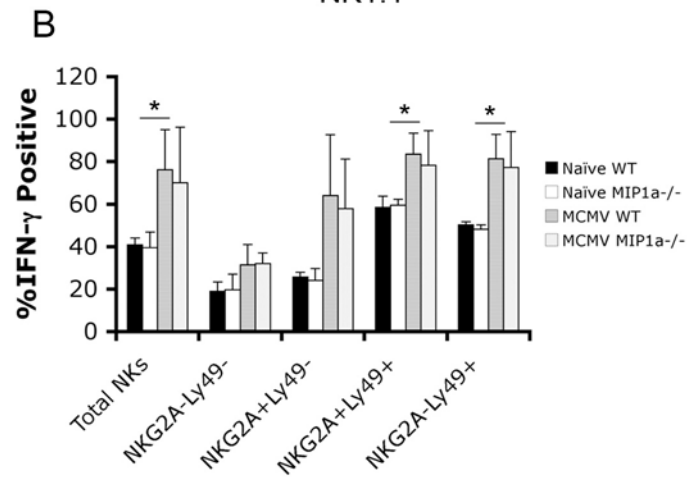

**Fig. S2. NKG2A<sup>+</sup>Ly49<sup>-</sup> NK cells display full functional capacity following viral infection.** Wildtype (WT) C57BL/6 or MIP1- $\alpha^{-/-}$  mice on the C57BL/6 background were injected intraperitoneally with  $5 \times 10^4$  pfu of murine cytomegalovirus (MCMV). Liver leukocytes were harvested 48 hours post-injection and stimulated with IL-12 and IL-18 for 5 hours. (A) Representative dot plots of intracellular IFN- $\gamma$  staining in NK cell subsets from naïve or viral infected WT or MIP1- $\alpha^{-/-}$  mice. (B) Combined results from a single experiment using 3 mice per group. (C) Combined results from a single experiment of mean fluorescent intensity of NKG2A staining on NKG2A<sup>+</sup>Ly49<sup>-</sup> NK cells from naïve or MCMV-infected wildtype mice. \* =  $p < 0.05$
